# Supplementary material
Source: publisher figshare collection journal article supplement (https://acs.figshare.com/ndownloader/files/4501957)
Supplement: Supplementary file 1 [file 4501957]

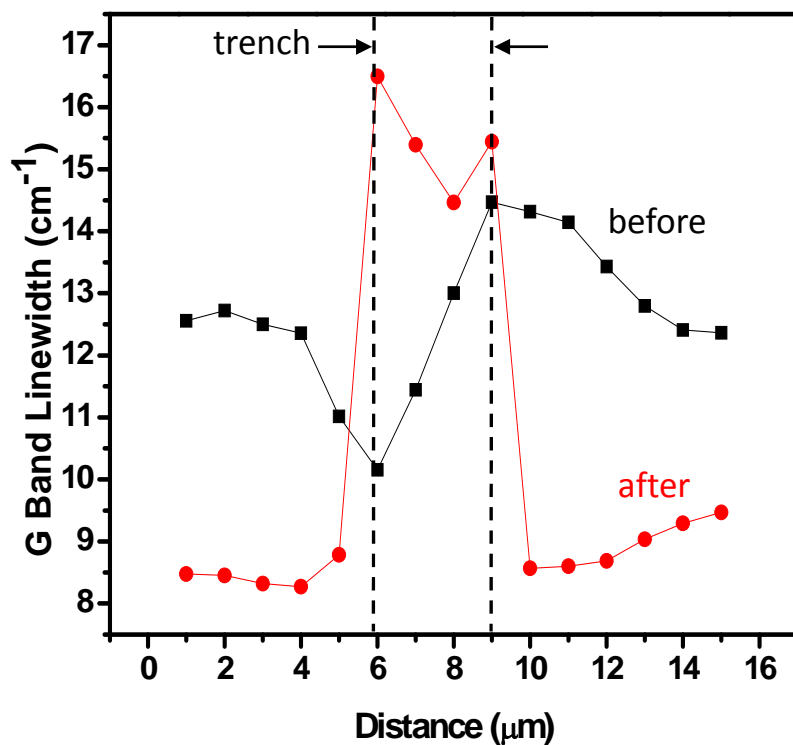

**Figure 1.** Spatial mapping of the *G* band Raman linewidth of the suspended graphene sample shown in Figure 1 of the manuscript taken before and after thermal cycling to 700K.
